# Supplementary material for: Aerobic Lineage of the Oxidative Stress Response Protein Rubrerythrin Emerged in an Ancient Microaerobic, (Hyper)Thermophilic Environment
Source: Front Microbiol. 2016 Nov 18;7:1822. doi: 10.3389/fmicb.2016.01822 (PMC5114695; doi:10.3389/fmicb.2016.01822)
Supplement: TABLE S2 — List of candidate aerobic rubrerythrins, DUF3501 and RFO in prokaryotic finished genomes from IMG-JGI database. This table includes a Venn diagram displaying the co-occurrence of these genes. [file Table_S2.xlsx]

## Sheet: Overview
	Organisms with Aero_RBR	Organisms with DUF3501	Organisms with RFO
	Acidianus hospitalis W1	Acidianus hospitalis W1	Acidithiobacillus caldus SM-1
	Acidithiobacillus caldus SM-1	Acidithiobacillus caldus SM-1	alpha proteobacterium sp. HIMB59 HIMB5
	alpha proteobacterium sp. HIMB59 HIMB5	alpha proteobacterium sp. HIMB59 HIMB5	Anaeromyxobacter dehalogenans 2CP-1
	Anaeromyxobacter dehalogenans 2CP-1	Anaeromyxobacter dehalogenans 2CP-1	Anaeromyxobacter dehalogenans 2CP-C
	Anaeromyxobacter dehalogenans 2CP-C	Anaeromyxobacter dehalogenans 2CP-C	Anaeromyxobacter sp. Fw109-5
	Anaeromyxobacter sp. Fw109-5	Anaeromyxobacter sp. Fw109-5	Anaeromyxobacter sp. K
	Anaeromyxobacter sp. K	Anaeromyxobacter sp. K	Azoarcus sp. KH32C
	Azoarcus sp. KH32C	Azoarcus sp. CIB	Azospirillum thiophilum BV-S
	Azospirillum brasilense Az39	Azoarcus sp. KH32C	Beggiatoa leptomitiformis D-402
	Azospirillum brasilense Sp245	Azospirillum brasilense Az39	Beggiatoa leptomitiformis D-402 null replaces 100909
	Azospirillum thiophilum BV-S	Azospirillum brasilense Sp245	Burkholderia ambifaria AMMD
	Bacillus sp. 1NLA3E	Azospirillum thiophilum BV-S	Burkholderia ambifaria MC40-6
	Beggiatoa leptomitiformis D-402	Bacillus sp. 1NLA3E	Burkholderia caribensis LMG 18531
	Beggiatoa leptomitiformis D-402 null replaces 100909	Beggiatoa leptomitiformis D-402	Burkholderia caribensis MBA4 (Finished genome of Burkholderia caribensis MBA4)
	Burkholderia ambifaria AMMD	Beggiatoa leptomitiformis D-402 null replaces 100909	Burkholderia cenocepacia AU 1054
	Burkholderia ambifaria MC40-6	Burkholderia ambifaria AMMD	Burkholderia cenocepacia DDS 22E-1
	Burkholderia caribensis LMG 18531	Burkholderia ambifaria MC40-6	Burkholderia cenocepacia DWS 37E-2
	Burkholderia caribensis MBA4 (Finished genome of Burkholderia caribensis MBA4)	Burkholderia caribensis LMG 18531	Burkholderia cenocepacia HI2424
	Burkholderia cenocepacia AU 1054	Burkholderia caribensis MBA4 (Finished genome of Burkholderia caribensis MBA4)	Burkholderia cenocepacia J2315
	Burkholderia cenocepacia DDS 22E-1	Burkholderia cenocepacia AU 1054	Burkholderia cenocepacia MC0-3
	Burkholderia cenocepacia DWS 37E-2	Burkholderia cenocepacia DDS 22E-1	Burkholderia cenocepacia ST32
	Burkholderia cenocepacia HI2424	Burkholderia cenocepacia DWS 37E-2	Burkholderia cepacia AMMD
	Burkholderia cenocepacia J2315	Burkholderia cenocepacia HI2424	Burkholderia cepacia DDS 7H-2
	Burkholderia cenocepacia MC0-3	Burkholderia cenocepacia J2315	Burkholderia cepacia GG4
	Burkholderia cenocepacia ST32	Burkholderia cenocepacia MC0-3	Burkholderia cepacia JBK9 (unscreened) replaces 59394
	Burkholderia cepacia DDS 7H-2	Burkholderia cenocepacia ST32	Burkholderia dolosa AU0158
	Burkholderia cepacia GG4	Burkholderia cepacia AMMD	Burkholderia dolosa PC543 (LMG 19468)
	Burkholderia cepacia JBK9	Burkholderia cepacia DDS 7H-2	Burkholderia mallei 092700E
	Burkholderia cepacia JBK9 (unscreened) replaces 59394	Burkholderia cepacia GG4	Burkholderia mallei 11
	Burkholderia dolosa AU0158	Burkholderia cepacia JBK9	Burkholderia mallei 2002721276
	Burkholderia dolosa PC543 (LMG 19468)	Burkholderia cepacia JBK9 (unscreened) replaces 59394	Burkholderia mallei 2002734299
	Burkholderia mallei 092700E	Burkholderia dolosa AU0158	Burkholderia mallei 2002734306
	Burkholderia mallei 11	Burkholderia dolosa PC543 (LMG 19468)	Burkholderia mallei 23344
	Burkholderia mallei 2002721276	Burkholderia mallei 092700E	Burkholderia mallei ATCC 23344
	Burkholderia mallei 2002734299	Burkholderia mallei 11	Burkholderia mallei BMK
	Burkholderia mallei 2002734306	Burkholderia mallei 2002721276	Burkholderia mallei BMQ
	Burkholderia mallei 23344	Burkholderia mallei 2002734299	Burkholderia mallei BMY
	Burkholderia mallei ATCC 23344	Burkholderia mallei 2002734306	Burkholderia mallei FMH 23344
	Burkholderia mallei BMK	Burkholderia mallei 23344	Burkholderia mallei India86-567-2
	Burkholderia mallei BMQ	Burkholderia mallei ATCC 23344	Burkholderia mallei KC_1092
	Burkholderia mallei BMY	Burkholderia mallei BMK	Burkholderia mallei NCTC 10229
	Burkholderia mallei FMH 23344	Burkholderia mallei BMQ	Burkholderia mallei NCTC 10247
	Burkholderia mallei India86-567-2	Burkholderia mallei BMY	Burkholderia mallei SAVP1
	Burkholderia mallei KC_1092	Burkholderia mallei FMH 23344	Burkholderia multivorans ATCC 17616
	Burkholderia mallei NCTC 10229	Burkholderia mallei India86-567-2	Burkholderia multivorans DDS 15A-1
	Burkholderia mallei NCTC 10247	Burkholderia mallei KC_1092	Burkholderia oklahomensis BDU
	Burkholderia mallei SAVP1	Burkholderia mallei NCTC 10229	Burkholderia oklahomensis C6786
	Burkholderia multivorans ATCC 17616	Burkholderia mallei NCTC 10247	Burkholderia phymatum STM815
	Burkholderia multivorans CEPA002, ATCC BAA-247	Burkholderia mallei SAVP1	Burkholderia pseudomallei 1026b
	Burkholderia multivorans DDS 15A-1	Burkholderia multivorans ATCC 17616	Burkholderia pseudomallei 1106aI
	Burkholderia oklahomensis BDU	Burkholderia multivorans CEPA002, ATCC BAA-247	Burkholderia pseudomallei 350105
	Burkholderia oklahomensis C6786	Burkholderia multivorans DDS 15A-1	Burkholderia pseudomallei 3921g
	Burkholderia phymatum STM815	Burkholderia oklahomensis BDU	Burkholderia pseudomallei 406e
	Burkholderia pseudomallei 1026b	Burkholderia oklahomensis C6786	Burkholderia pseudomallei 668I
	Burkholderia pseudomallei 1106aI	Burkholderia phymatum STM815	Burkholderia pseudomallei 7894
	Burkholderia pseudomallei 350105	Burkholderia pseudomallei 1026b	Burkholderia pseudomallei 982
	Burkholderia pseudomallei 3921g	Burkholderia pseudomallei 1106aI	Burkholderia pseudomallei A79A
	Burkholderia pseudomallei 406e	Burkholderia pseudomallei 350105	Burkholderia pseudomallei B03
	Burkholderia pseudomallei 668I	Burkholderia pseudomallei 3921g	Burkholderia pseudomallei BDP
	Burkholderia pseudomallei 7894	Burkholderia pseudomallei 406e	Burkholderia pseudomallei BEO
	Burkholderia pseudomallei 982	Burkholderia pseudomallei 668I	Burkholderia pseudomallei BEX
	Burkholderia pseudomallei A79A	Burkholderia pseudomallei 7894	Burkholderia pseudomallei BEZ
	Burkholderia pseudomallei B03	Burkholderia pseudomallei 982	Burkholderia pseudomallei BFB
	Burkholderia pseudomallei BDP	Burkholderia pseudomallei A79A	Burkholderia pseudomallei BGR
	Burkholderia pseudomallei BEO	Burkholderia pseudomallei B03	Burkholderia pseudomallei Bp1651
	Burkholderia pseudomallei BEX	Burkholderia pseudomallei BDP	Burkholderia pseudomallei BPC006
	Burkholderia pseudomallei BEZ	Burkholderia pseudomallei BEO	Burkholderia pseudomallei BSR
	Burkholderia pseudomallei BFB	Burkholderia pseudomallei BEX	Burkholderia pseudomallei HBPUB10134a
	Burkholderia pseudomallei BGR	Burkholderia pseudomallei BEZ	Burkholderia pseudomallei HBPUB10303a
	Burkholderia pseudomallei Bp1651	Burkholderia pseudomallei BFB	Burkholderia pseudomallei K42
	Burkholderia pseudomallei BPC006	Burkholderia pseudomallei BGR	Burkholderia pseudomallei K96243
	Burkholderia pseudomallei BSR	Burkholderia pseudomallei Bp1651	Burkholderia pseudomallei K96243
	Burkholderia pseudomallei HBPUB10134a	Burkholderia pseudomallei BPC006	Burkholderia pseudomallei Mahidol-1106a
	Burkholderia pseudomallei HBPUB10303a	Burkholderia pseudomallei BSR	Burkholderia pseudomallei MSHR1153
	Burkholderia pseudomallei K42	Burkholderia pseudomallei HBPUB10134a	Burkholderia pseudomallei MSHR1328
	Burkholderia pseudomallei K96243	Burkholderia pseudomallei HBPUB10303a	Burkholderia pseudomallei MSHR1328 null replaces 78555
	Burkholderia pseudomallei K96243	Burkholderia pseudomallei K42	Burkholderia pseudomallei MSHR146
	Burkholderia pseudomallei Mahidol-1106a	Burkholderia pseudomallei K96243	Burkholderia pseudomallei MSHR2243
	Burkholderia pseudomallei MSHR1153	Burkholderia pseudomallei K96243	Burkholderia pseudomallei MSHR2543
	Burkholderia pseudomallei MSHR1328	Burkholderia pseudomallei Mahidol-1106a	Burkholderia pseudomallei MSHR305
	Burkholderia pseudomallei MSHR1328 null replaces 78555	Burkholderia pseudomallei MSHR1153	Burkholderia pseudomallei MSHR3965
	Burkholderia pseudomallei MSHR146	Burkholderia pseudomallei MSHR1328	Burkholderia pseudomallei MSHR435 null replaces 78605
	Burkholderia pseudomallei MSHR2243	Burkholderia pseudomallei MSHR1328 null replaces 78555	Burkholderia pseudomallei MSHR491
	Burkholderia pseudomallei MSHR2543	Burkholderia pseudomallei MSHR146	Burkholderia pseudomallei MSHR511
	Burkholderia pseudomallei MSHR305	Burkholderia pseudomallei MSHR2243	Burkholderia pseudomallei MSHR520
	Burkholderia pseudomallei MSHR3965	Burkholderia pseudomallei MSHR2543	Burkholderia pseudomallei MSHR5848
	Burkholderia pseudomallei MSHR435 null replaces 78605	Burkholderia pseudomallei MSHR305	Burkholderia pseudomallei MSHR5855
	Burkholderia pseudomallei MSHR491	Burkholderia pseudomallei MSHR3965	Burkholderia pseudomallei MSHR5858
	Burkholderia pseudomallei MSHR511	Burkholderia pseudomallei MSHR435 null replaces 78605	Burkholderia pseudomallei MSHR62
	Burkholderia pseudomallei MSHR520	Burkholderia pseudomallei MSHR491	Burkholderia pseudomallei MSHR668
	Burkholderia pseudomallei MSHR5848	Burkholderia pseudomallei MSHR511	Burkholderia pseudomallei MSHR840
	Burkholderia pseudomallei MSHR5855	Burkholderia pseudomallei MSHR520	Burkholderia pseudomallei NAU20B-16
	Burkholderia pseudomallei MSHR5858	Burkholderia pseudomallei MSHR5848	Burkholderia pseudomallei NAU35A-3
	Burkholderia pseudomallei MSHR62	Burkholderia pseudomallei MSHR5855	Burkholderia pseudomallei NCTC 13178
	Burkholderia pseudomallei MSHR668	Burkholderia pseudomallei MSHR5858	Burkholderia pseudomallei NCTC 13179
	Burkholderia pseudomallei MSHR840	Burkholderia pseudomallei MSHR62	Burkholderia pseudomallei PB08298010
	Burkholderia pseudomallei NAU20B-16	Burkholderia pseudomallei MSHR668	Burkholderia pseudomallei TSV 48
	Burkholderia pseudomallei NAU35A-3	Burkholderia pseudomallei MSHR840	Burkholderia pseudomallei vgh07
	Burkholderia pseudomallei NCTC 13178	Burkholderia pseudomallei NAU20B-16	Burkholderia pseudomallei vgh16R
	Burkholderia pseudomallei NCTC 13179	Burkholderia pseudomallei NAU35A-3	Burkholderia pseudomallei vgh16W
	Burkholderia pseudomallei PB08298010	Burkholderia pseudomallei NCTC 13178	Burkholderia pyrrocinia strain:DSM 10685
	Burkholderia pseudomallei TSV 48	Burkholderia pseudomallei NCTC 13179	Burkholderia sp. 2002721687
	Burkholderia pseudomallei vgh07	Burkholderia pseudomallei PB08298010	Burkholderia sp. 383
	Burkholderia pseudomallei vgh16R	Burkholderia pseudomallei TSV 48	Burkholderia sp. BGK
	Burkholderia pseudomallei vgh16W	Burkholderia pseudomallei vgh07	Burkholderia sp. TSV202
	Burkholderia pyrrocinia strain:DSM 10685	Burkholderia pseudomallei vgh16R	Burkholderia thailandensis 2002721643
	Burkholderia sp. 2002721687	Burkholderia pseudomallei vgh16W	Burkholderia thailandensis 2002721723
	Burkholderia sp. 383	Burkholderia pyrrocinia strain:DSM 10685	Burkholderia thailandensis 34
	Burkholderia sp. BGK	Burkholderia sp. 2002721687	Burkholderia thailandensis BDK
	Burkholderia sp. TSV202	Burkholderia sp. 383	Burkholderia thailandensis E254
	Burkholderia thailandensis 2002721643	Burkholderia sp. BGK	Burkholderia thailandensis E264I
	Burkholderia thailandensis 2002721723	Burkholderia sp. TSV202	Burkholderia thailandensis E444
	Burkholderia thailandensis 34	Burkholderia thailandensis 2002721643	Burkholderia thailandensis H0587
	Burkholderia thailandensis BDK	Burkholderia thailandensis 2002721723	Burkholderia thailandensis MSMB121
	Burkholderia thailandensis E254	Burkholderia thailandensis 34	Burkholderia thailandensis MSMB59
	Burkholderia thailandensis E264I	Burkholderia thailandensis BDK	Burkholderia thailandensis USAMRU Malaysia #20
	Burkholderia thailandensis E444	Burkholderia thailandensis E254	Burkholderia ubonensis MSMB22
	Burkholderia thailandensis H0587	Burkholderia thailandensis E264I	Burkholderiales bacterium GJ-E10
	Burkholderia thailandensis MSMB121	Burkholderia thailandensis E444	Candidatus Nitrospira defluvii
	Burkholderia thailandensis MSMB59	Burkholderia thailandensis H0587	Candidatus Paracaedibacter acanthamoebae PRA3
	Burkholderia thailandensis USAMRU Malaysia #20	Burkholderia thailandensis MSMB121	Candidatus Pelagibacter ubique HTCC1062
	Burkholderia ubonensis MSMB22	Burkholderia thailandensis MSMB59	Cycloclasticus sp. P1
	Burkholderiales bacterium GJ-E10	Burkholderia thailandensis USAMRU Malaysia #20	Cycloclasticus zancles 7-ME
	Caldivirga maquilingensis IC-167	Burkholderia ubonensis MSMB22	Ferrimonas balearica DSM 9799
	Candidatus Nitrospira defluvii	Burkholderiales bacterium GJ-E10	Hydrogenobacter thermophilus TK-6
	Candidatus Paracaedibacter acanthamoebae PRA3	Caldivirga maquilingensis IC-167	Hydrogenobaculum sp. 3684 ((Finished QAed))
	Candidatus Pelagibacter ubique HTCC1062	Candidatus Nitrospira defluvii	Hydrogenobaculum sp. HO ((Finished QAed))
	Cycloclasticus sp. P1	Candidatus Paracaedibacter acanthamoebae PRA3	Hydrogenobaculum sp. SHO (Final Finished Sequence)
	Cycloclasticus zancles 7-ME	Candidatus Pelagibacter ubique HTCC1062	Hydrogenobaculum sp. SN
	Ferrimonas balearica DSM 9799	Cycloclasticus sp. P1	Hydrogenobaculum sp. Y04AAS1
	Frankia alni ACN14a	Cycloclasticus zancles 7-ME	Labilithrix luteola DSM 27648
	Frankia sp. CcI3	Ferrimonas balearica DSM 9799	Leptospirillum ferriphilum ML-04
	Frankia sp. EAN1pec	Frankia alni ACN14a	Leptospirillum ferriphilum YSK
	Frankia sp. EuI1c	Frankia sp. CcI3	Leptospirillum sp. Group II CF-1
	Frankia symbiont of Datisca glomerata	Frankia sp. EAN1pec	Leptothrix cholodnii SP-6
	Haliangium ochraceum DSM 14365	Frankia sp. EuI1c	Metallosphaera cuprina Ar-4
	Hydrogenobacter thermophilus TK-6	Frankia symbiont of Datisca glomerata	Metallosphaera sedula ARS120-1
	Hydrogenobaculum sp. 3684 ((Finished QAed))	Haliangium ochraceum DSM 14365	Metallosphaera sedula ARS120-2
	Hydrogenobaculum sp. HO ((Finished QAed))	Hydrogenobacter thermophilus TK-6	Metallosphaera sedula ARS50-2
	Hydrogenobaculum sp. SHO (Final Finished Sequence)	Hydrogenobaculum sp. 3684 ((Finished QAed))	Metallosphaera sedula SARC-M1
	Hydrogenobaculum sp. SN	Hydrogenobaculum sp. HO ((Finished QAed))	Methylibium petroleiphilum PM1
	Hydrogenobaculum sp. Y04AAS1	Hydrogenobaculum sp. SHO (Final Finished Sequence)	Methylocystis sp. SC2
	Kryptonium sp. JGI-3 Ga0063199	Hydrogenobaculum sp. SN	Nitrosomonas sp. AL212
	Labilithrix luteola DSM 27648	Hydrogenobaculum sp. Y04AAS1	Nitrosomonas sp. Is79A3
	Leptospirillum ferriphilum ML-04	Kryptonium sp. JGI-3 Ga0063199	Nitrosospira briensis C-128
	Leptospirillum ferriphilum YSK	Labilithrix luteola DSM 27648	Nitrosospira multiformis ATCC 25196
	Leptospirillum ferrooxidans C2-3	Leptospirillum ferriphilum ML-04	Nitrospira moscoviensis NSP M-1
	Leptospirillum sp. Group II CF-1	Leptospirillum ferriphilum YSK	Pandoraea thiooxydans DSM 25325
	Leptothrix cholodnii SP-6	Leptospirillum ferrooxidans C2-3	Parvibaculum lavamentivorans DS-1
	Metallosphaera cuprina Ar-4	Leptospirillum sp. Group II CF-1	Polaromonas sp. JS666
	Metallosphaera sedula ARS120-1	Leptothrix cholodnii SP-6	Polynucleobacter necessarius subsp. asymbioticus
	Metallosphaera sedula ARS120-2	Metallosphaera cuprina Ar-4	Rhodanobacter sp. 2APBS1
	Metallosphaera sedula ARS50-2	Metallosphaera sedula ARS120-1	Rhodoferax ferrireducens T118
	Metallosphaera sedula DSM 5348	Metallosphaera sedula ARS120-2	Sedimenticola sp. SIP-G1
	Metallosphaera sedula SARC-M1	Metallosphaera sedula ARS50-2	Sedimenticola sp. SIP-G1 null replaces 81741
	Methylibium petroleiphilum PM1	Metallosphaera sedula DSM 5348	Sedimenticola thiotaurini SIP-G1
	Methylocystis sp. SC2	Metallosphaera sedula SARC-M1	Sideroxydans lithotrophicus ES-1
	Nitrosomonas sp. AL212	Methylibium petroleiphilum PM1	Sulfobacillus acidophilus TPY
	Nitrosomonas sp. Is79A3	Methylocystis sp. SC2	Sulfolobus acidocaldarius DSM 639
	Nitrosospira briensis C-128	Nitrosomonas sp. AL212	Sulfolobus acidocaldarius GG12-C01-09
	Nitrosospira multiformis ATCC 25196	Nitrosomonas sp. Is79A3	Sulfolobus acidocaldarius N8
	Nitrospira moscoviensis NSP M-1	Nitrosospira briensis C-128	Sulfolobus acidocaldarius NG05B_CO5_07
	Pandoraea thiooxydans DSM 25325	Nitrosospira multiformis ATCC 25196	Sulfolobus acidocaldarius Ron12/I
	Parvibaculum lavamentivorans DS-1	Nitrospira moscoviensis NSP M-1	Sulfolobus acidocaldarius SUSAZ
	Polaromonas sp. JS666	Pandoraea thiooxydans DSM 25325	Sulfolobus islandicus HVE10/4
	Polynucleobacter necessarius subsp. asymbioticus	Parvibaculum lavamentivorans DS-1	Sulfolobus islandicus L.S.2.15
	Rhodanobacter sp. 2APBS1	Polaromonas sp. JS666	Sulfolobus islandicus LAL14/1
	Rhodoferax ferrireducens T118	Polynucleobacter necessarius subsp. asymbioticus	Sulfolobus islandicus M.14.25
	Sedimenticola sp. SIP-G1	Rhodanobacter sp. 2APBS1	Sulfolobus islandicus M.16.27
	Sedimenticola sp. SIP-G1 null replaces 81741	Rhodoferax ferrireducens T118	Sulfolobus islandicus M.16.4
	Sedimenticola thiotaurini SIP-G1	Sedimenticola sp. SIP-G1	Sulfolobus islandicus Y.G.57.14
	Sideroxydans lithotrophicus ES-1	Sedimenticola sp. SIP-G1 null replaces 81741	Sulfolobus islandicus Y.N.15.51
	Sorangium cellulosum 'So ce 56'	Sedimenticola thiotaurini SIP-G1	Sulfolobus solfataricus 98/2
	Sorangium cellulosum So0157-2	Sideroxydans lithotrophicus ES-1	Sulfolobus solfataricus 98/2 SULC
	Sulfobacillus acidophilus NAL, DSM 10332	Sorangium cellulosum 'So ce 56'	Sulfolobus solfataricus P2
	Sulfobacillus acidophilus TPY	Sorangium cellulosum So0157-2	Sulfolobus solfataricus SULA
	Sulfolobus acidocaldarius DSM 639	Sulfobacillus acidophilus NAL, DSM 10332	Sulfolobus solfataricus SULB
	Sulfolobus acidocaldarius GG12-C01-09	Sulfobacillus acidophilus TPY	Sulfolobus tokodaii str. 7 DNA
	Sulfolobus acidocaldarius N8	Sulfolobus acidocaldarius DSM 639	Thermocrinis albus DSM 14484
	Sulfolobus acidocaldarius NG05B_CO5_07	Sulfolobus acidocaldarius GG12-C01-09	Thermocrinis ruber DSM 12173
	Sulfolobus acidocaldarius Ron12/I	Sulfolobus acidocaldarius N8	Thioalkalivibrio nitratireducens DSM 14787
	Sulfolobus acidocaldarius SUSAZ	Sulfolobus acidocaldarius NG05B_CO5_07	Thioalkalivibrio sp. HL-EbGR7
	Sulfolobus islandicus HVE10/4	Sulfolobus acidocaldarius Ron12/I	Thioalkalivibrio sp. K90mix
	Sulfolobus islandicus L.D.8.5	Sulfolobus acidocaldarius SUSAZ	Thioalkalivibrio thiocyanoxidans ARh 4
	Sulfolobus islandicus L.S.2.15	Sulfolobus islandicus HVE10/4	Thioalkalivibrio versutus D301
	Sulfolobus islandicus LAL14/1	Sulfolobus islandicus L.D.8.5	Thiobacillus denitrificans ATCC 25259
	Sulfolobus islandicus M.14.25	Sulfolobus islandicus L.S.2.15	Wenzhouxiangella marina KCTC 42284
	Sulfolobus islandicus M.16.27	Sulfolobus islandicus LAL14/1
	Sulfolobus islandicus M.16.4	Sulfolobus islandicus M.14.25
	Sulfolobus islandicus REY15A	Sulfolobus islandicus M.16.27
	Sulfolobus islandicus Y.G.57.14	Sulfolobus islandicus M.16.4
	Sulfolobus islandicus Y.N.15.51	Sulfolobus islandicus REY15A
	Sulfolobus solfataricus 98/2	Sulfolobus islandicus Y.G.57.14
	Sulfolobus solfataricus 98/2 SULC	Sulfolobus islandicus Y.N.15.51
	Sulfolobus solfataricus P2	Sulfolobus solfataricus 98/2
	Sulfolobus solfataricus SULA	Sulfolobus solfataricus 98/2 SULC
	Sulfolobus solfataricus SULB	Sulfolobus solfataricus P2
	Sulfolobus tokodaii str. 7 DNA	Sulfolobus solfataricus SULA
	Thermocrinis albus DSM 14484	Sulfolobus solfataricus SULB
	Thermocrinis ruber DSM 12173	Sulfolobus tokodaii str. 7 DNA
	Thermoproteus uzoniensis 768-20	Thermocrinis albus DSM 14484
	Thioalkalivibrio nitratireducens DSM 14787	Thermocrinis ruber DSM 12173
	Thioalkalivibrio sp. HL-EbGR7	Thermoproteus uzoniensis 768-20
	Thioalkalivibrio sp. K90mix	Thioalkalivibrio nitratireducens DSM 14787
	Thioalkalivibrio thiocyanoxidans ARh 4	Thioalkalivibrio sp. HL-EbGR7
	Thioalkalivibrio versutus D301	Thioalkalivibrio sp. K90mix
	Thiobacillus denitrificans ATCC 25259	Thioalkalivibrio thiocyanoxidans ARh 4
	Thiocystis violascens 611, DSM 198	Thioalkalivibrio versutus D301
	Vulcanisaeta distributa DSM 14429	Thiobacillus denitrificans ATCC 25259
	Vulcanisaeta moutnovskia 768-28	Thiocystis violascens 611, DSM 198
	Wenzhouxiangella marina KCTC 42284	Vulcanisaeta distributa DSM 14429
		Vulcanisaeta moutnovskia 768-28
		Wenzhouxiangella marina KCTC 42284
	Genomes with RFO and DUF3501 only
	Burkholderia cepacia AMMD
	Genomes with DUF3501 only
	Azoarcus sp. CIB

## Sheet: Aero_RBR
gene_oid	Locus Tag / Gene Product Name	Source
650847272	Ahos_1042 Rubrerythrin	Acidianus hospitalis W1
651042139	Atc_0874 Rubrerythrin	Acidithiobacillus caldus SM-1
2522025116	rbr Rubrerythrin	alpha proteobacterium sp. HIMB59 HIMB5
643593609	A2cp1_0816 Rubrerythrin	Anaeromyxobacter dehalogenans 2CP-1
637862286	Adeh_0765 Rubrerythrin	Anaeromyxobacter dehalogenans 2CP-C
640842320	Anae109_0811 Rubrerythrin	Anaeromyxobacter sp. Fw109-5
642762264	AnaeK_0812 Rubrerythrin	Anaeromyxobacter sp. K
2563611186	AZKH_1050 Rubrerythrin	Azoarcus sp. KH32C
2579564344	ABAZ39_01335 Rubrerythrin	Azospirillum brasilense Az39
2512038596	AZOBR_10296 Rubrerythrin	Azospirillum brasilense Sp245
2647889864	Ga0100904_142702 Rubrerythrin	Azospirillum thiophilum BV-S
2506742341	B1NLA3E_1895 Rubrerythrin	Bacillus sp. 1NLA3E
2646223082	Ga0100909_11800 Rubrerythrin	Beggiatoa leptomitiformis D-402
2656600978	Ga0111282_11800 Rubrerythrin	Beggiatoa leptomitiformis D-402 null replaces 100909
2632568885	BPSS1839 Rubrerythrin	Burkholderia ambifaria AMMD
641683488	BPSS1839 Rubrerythrin	Burkholderia ambifaria MC40-6
2643278987	BPSS1839 Rubrerythrin	Burkholderia caribensis LMG 18531
2640362641	BPSS1839 Rubrerythrin	Burkholderia caribensis MBA4 (Finished genome of Burkholderia caribensis MBA4)
638017835	BPSS1839 Rubrerythrin	Burkholderia cenocepacia AU 1054
2598456079	BPSS1839 Rubrerythrin	Burkholderia cenocepacia DDS 22E-1
2640998206	BPSS1839 Rubrerythrin	Burkholderia cenocepacia DWS 37E-2
639695873	BPSS1839 Rubrerythrin	Burkholderia cenocepacia HI2424
643353290	BPSS1839 putative rubyerythrin	Burkholderia cenocepacia J2315
641650817	BPSS1839 Rubrerythrin	Burkholderia cenocepacia MC0-3
2654730113	BPSS1839 Rubrerythrin	Burkholderia cenocepacia ST32
2598309533	BPSS1839 Rubrerythrin	Burkholderia cepacia DDS 7H-2
2521978957	BPSS1839 Rubrerythrin	Burkholderia cepacia GG4
2590851104	BPSS1839 Rubrerythrin	Burkholderia cepacia JBK9
2662414293	BPSS1839 Rubrerythrin	Burkholderia cepacia JBK9 (unscreened) replaces 59394
2648757510	BPSS1839 Rubrerythrin	Burkholderia dolosa AU0158
2527195718	BPSS1839 Rubrerythrin	Burkholderia dolosa PC543 (LMG 19468)
2598383532	BPSS1839 Rubrerythrin	Burkholderia mallei 092700E
2642173070	BPSS1839 Rubrerythrin	Burkholderia mallei 11
2646685815	BPSS1839 Rubrerythrin	Burkholderia mallei 2002721276
2649044781	BPSS1839 Rubrerythrin	Burkholderia mallei 2002734299
2637982367	BPSS1839 Rubrerythrin	Burkholderia mallei 2002734306
2598314787	BPSS1839 Rubrerythrin	Burkholderia mallei 23344
637564196	BPSS1839 rubrerythrin	Burkholderia mallei ATCC 23344
2598467220	BPSS1839 Rubrerythrin	Burkholderia mallei BMK
2598379241	BPSS1839 Rubrerythrin	Burkholderia mallei BMQ
2598292807	BPSS1839 Rubrerythrin	Burkholderia mallei BMY
2598416652	BPSS1839 Rubrerythrin	Burkholderia mallei FMH 23344
2636866907	BPSS1839 Rubrerythrin	Burkholderia mallei India86-567-2
2647776940	BPSS1839 Rubrerythrin	Burkholderia mallei KC_1092
640094695	BPSS1839 rubrerythrin	Burkholderia mallei NCTC 10229
640146579	BPSS1839 rubrerythrin	Burkholderia mallei NCTC 10247
639843964	BPSS1839 rubrerythrin	Burkholderia mallei SAVP1
641319216	BPSS1839 Rubrerythrin	Burkholderia multivorans ATCC 17616
642673657	BPSS1839 putative oxidative stress-related rubrerythrin protein	Burkholderia multivorans ATCC 17616
2638617153	BPSS1839 Rubrerythrin	Burkholderia multivorans CEPA002, ATCC BAA-247
2598439922	BPSS1839 Rubrerythrin	Burkholderia multivorans DDS 15A-1
2598406298	BPSS1839 Rubrerythrin	Burkholderia oklahomensis BDU
2628341007	BPSS1839 Rubrerythrin	Burkholderia oklahomensis C6786
642595877	BPSS1839 rubrerythrin	Burkholderia phymatum STM815
2514235338	BPSS1839 Rubrerythrin	Burkholderia pseudomallei 1026b
2628588842	BPSS1839 Rubrerythrin	Burkholderia pseudomallei 1026b
640145595	BPSS1839 putative rubrerythrin	Burkholderia pseudomallei 1106aI
2651400534	BPSS1839 Rubrerythrin	Burkholderia pseudomallei 350105
2636469613	BPSS1839 Rubrerythrin	Burkholderia pseudomallei 3921g
2654677339	BPSS1839 Rubrerythrin	Burkholderia pseudomallei 406e
640132566	BPSS1839 putative rubrerythrin	Burkholderia pseudomallei 668I
2629552895	BPSS1839 Rubrerythrin	Burkholderia pseudomallei 7894
2647854082	BPSS1839 Rubrerythrin	Burkholderia pseudomallei 982
2632080551	BPSS1839 Rubrerythrin	Burkholderia pseudomallei A79A
2636440017	BPSS1839 Rubrerythrin	Burkholderia pseudomallei B03
2629435399	BPSS1839 Rubrerythrin	Burkholderia pseudomallei BDP
2598268196	BPSS1839 Rubrerythrin	Burkholderia pseudomallei BEO
2598341019	BPSS1839 Rubrerythrin	Burkholderia pseudomallei BEX
2598325191	BPSS1839 Rubrerythrin	Burkholderia pseudomallei BEZ
2598450825	BPSS1839 Rubrerythrin	Burkholderia pseudomallei BFB
2598210000	BPSS1839 Rubrerythrin	Burkholderia pseudomallei BGR
2652608453	BPSS1839 Rubrerythrin	Burkholderia pseudomallei Bp1651
2521949829	BPSS1839 Rubrerythrin	Burkholderia pseudomallei BPC006
2598521887	BPSS1839 Rubrerythrin	Burkholderia pseudomallei BSR
2599221270	BPSS1839 Rubrerythrin	Burkholderia pseudomallei HBPUB10134a
2598486742	BPSS1839 Rubrerythrin	Burkholderia pseudomallei HBPUB10303a
2630056815	BPSS1839 Rubrerythrin	Burkholderia pseudomallei K42
2653063008	BPSS1839 Rubrerythrin	Burkholderia pseudomallei K96243
637571270	BPSS1839 oxidative stress related rubrerythrin protein	Burkholderia pseudomallei K96243
2598388458	BPSS1839 Rubrerythrin	Burkholderia pseudomallei Mahidol-1106a
2629013913	BPSS1839 Rubrerythrin	Burkholderia pseudomallei MSHR1153
2628672965	BPSS1839 Rubrerythrin	Burkholderia pseudomallei MSHR1328
2668554490	BPSS1839 Rubrerythrin	Burkholderia pseudomallei MSHR1328 null replaces 78555
2559247625	BPSS1839 Rubrerythrin	Burkholderia pseudomallei MSHR146
2631626765	BPSS1839 Rubrerythrin	Burkholderia pseudomallei MSHR2243
2632872375	BPSS1839 Rubrerythrin	Burkholderia pseudomallei MSHR2543
2563663514	BPSS1839 Rubrerythrin	Burkholderia pseudomallei MSHR305
2647669967	BPSS1839 Rubrerythrin	Burkholderia pseudomallei MSHR3965
2668396994	BPSS1839 Rubrerythrin	Burkholderia pseudomallei MSHR435 null replaces 78605
2630394553	BPSS1839 Rubrerythrin	Burkholderia pseudomallei MSHR491
2559244102	BPSS1839 Rubrerythrin	Burkholderia pseudomallei MSHR511
2563748388	BPSS1839 Rubrerythrin	Burkholderia pseudomallei MSHR520
2598399630	BPSS1839 Rubrerythrin	Burkholderia pseudomallei MSHR5848
2598410398	BPSS1839 Rubrerythrin	Burkholderia pseudomallei MSHR5855
2598216823	BPSS1839 Rubrerythrin	Burkholderia pseudomallei MSHR5858
2636758916	BPSS1839 Rubrerythrin	Burkholderia pseudomallei MSHR62
2628442384	BPSS1839 Rubrerythrin	Burkholderia pseudomallei MSHR668
2648507997	BPSS1839 Rubrerythrin	Burkholderia pseudomallei MSHR840
2559234465	BPSS1839 Rubrerythrin	Burkholderia pseudomallei NAU20B-16
2633564435	BPSS1839 Rubrerythrin	Burkholderia pseudomallei NAU35A-3
2559254129	BPSS1839 Rubrerythrin	Burkholderia pseudomallei NCTC 13178
2555777301	BPSS1839 Rubrerythrin	Burkholderia pseudomallei NCTC 13179
2637821215	BPSS1839 Rubrerythrin	Burkholderia pseudomallei PB08298010
2628487321	BPSS1839 Rubrerythrin	Burkholderia pseudomallei TSV 48
2636819139	BPSS1839 Rubrerythrin	Burkholderia pseudomallei vgh07
2651676399	BPSS1839 Rubrerythrin	Burkholderia pseudomallei vgh16R
2647996500	BPSS1839 Rubrerythrin	Burkholderia pseudomallei vgh16W
2633141939	BPSS1839 Rubrerythrin	Burkholderia pyrrocinia strain:DSM 10685
2630033486	BPSS1839 Rubrerythrin	Burkholderia sp. 2002721687
637767128	BPSS1839 Rubrerythrin	Burkholderia sp. 383
2628765961	BPSS1839 Rubrerythrin	Burkholderia sp. BGK
2632116366	BPSS1839 Rubrerythrin	Burkholderia sp. TSV202
2633800321	BPSS1839 Rubrerythrin	Burkholderia thailandensis 2002721643
2559267607	BPSS1839 Rubrerythrin	Burkholderia thailandensis 2002721723
2632123241	BPSS1839 Rubrerythrin	Burkholderia thailandensis 34
2630093713	BPSS1839 Rubrerythrin	Burkholderia thailandensis BDK
2636924598	BPSS1839 Rubrerythrin	Burkholderia thailandensis E254
637837843	BPSS1839 rubrerythrin	Burkholderia thailandensis E264I
2559274239	BPSS1839 Rubrerythrin	Burkholderia thailandensis E444
2559260362	BPSS1839 Rubrerythrin	Burkholderia thailandensis H0587
2540843953	BPSS1839 Rubrerythrin	Burkholderia thailandensis MSMB121
2635809688	BPSS1839 Rubrerythrin	Burkholderia thailandensis MSMB59
2585942887	BPSS1839 Rubrerythrin	Burkholderia thailandensis USAMRU Malaysia #20
2628972398	BPSS1839 Rubrerythrin	Burkholderia ubonensis MSMB22
2677844604	Ga0123801_11768 Rubrerythrin	Burkholderiales bacterium GJ-E10
641274562	Cmaq_0059 Rubrerythrin	Caldivirga maquilingensis IC-167
649662142	rbr rubrerythrin	Candidatus Nitrospira defluvii
2655720770	Ga0057671_112090 Rubrerythrin	Candidatus Paracaedibacter acanthamoebae PRA3
637671262	rbr Rubrerythrin	Candidatus Pelagibacter ubique HTCC1062
2520067233	Q91_1434 Rubrerythrin	Cycloclasticus sp. P1
2562496086	CYCME_1030 Rubrerythrin	Cycloclasticus zancles 7-ME
648213119	rbr Rubrerythrin	Ferrimonas balearica DSM 9799
638101789	FRAAL5116 Rubrerythrin (rr)	Frankia alni ACN14a
637880432	FRAAL5116 Rubrerythrin	Frankia sp. CcI3
641240728	FRAAL5116 Rubrerythrin	Frankia sp. EAN1pec
649748891	FraEuI1c_1792 Rubrerythrin	Frankia sp. EuI1c
2506867742	FRAAL5116 Rubrerythrin	Frankia symbiont of Datisca glomerata
646386908	Hoch_2201 Rubrerythrin	Haliangium ochraceum DSM 14365
646541318	HTH_1222 rubrerythrin	Hydrogenobacter thermophilus TK-6
650434382	Hydth_1214 Rubrerythrin	Hydrogenobacter thermophilus TK-6
2506379472	Hyd3684_0889 Rubrerythrin	Hydrogenobaculum sp. 3684 ((Finished QAed))
2506377805	HydHO_0894 Rubrerythrin	Hydrogenobaculum sp. HO ((Finished QAed))
2505958972	hydr_0001.00008860 Rubrerythrin	Hydrogenobaculum sp. SHO (Final Finished Sequence)
2507463580	HydSN_0917 Rubrerythrin	Hydrogenobaculum sp. SN
642750705	HY04AAS1_0899 Rubrerythrin	Hydrogenobaculum sp. Y04AAS1
2599797495	JGI3_00921 Rubrerythrin	Kryptonium sp. JGI-3 Ga0063199
2646038628	Ga0098217_113883 Rubrerythrin	Labilithrix luteola DSM 27648
2519477850	LFML04_0428 Rubrerythrin	Leptospirillum ferriphilum ML-04
2578398356	Y981_02200 Rubrerythrin	Leptospirillum ferriphilum YSK
2540577289	LFE_0447 Rubrerythrin	Leptospirillum ferrooxidans C2-3
2655040034	Ga0081805_11432 Rubrerythrin	Leptospirillum sp. Group II CF-1
641665451	Lcho_2674 Rubrerythrin	Leptothrix cholodnii SP-6
650822161	Mcup_1772 rubrerythrin	Metallosphaera cuprina Ar-4
2648077193	Ga0100896_11588 Rubrerythrin	Metallosphaera sedula ARS120-1
2645880737	Ga0100943_11588 Rubrerythrin	Metallosphaera sedula ARS120-2
2649217998	Ga0100884_11588 Rubrerythrin	Metallosphaera sedula ARS50-2
640506202	Msed_0296 Rubrerythrin	Metallosphaera sedula DSM 5348
2652524517	Ga0100883_11587 Rubrerythrin	Metallosphaera sedula SARC-M1
640090666	Mpe_A2098 putative oxidative stress related rubrerythrin protein	Methylibium petroleiphilum PM1
2540712060	BN69_0484 Rubrerythrin	Methylocystis sp. SC2
650753536	NAL212_0969 Rubrerythrin	Nitrosomonas sp. AL212
651003837	Nit79A3_2479 Rubrerythrin	Nitrosomonas sp. Is79A3
2588207401	F822DRAFT_2755 Rubrerythrin	Nitrosospira briensis C-128
637811932	Nmul_A1847 Rubrerythrin	Nitrosospira multiformis ATCC 25196
2641368595	rbr Rubrerythrin	Nitrospira moscoviensis NSP M-1
2641367356	rbr Rubrerythrin	Nitrospira moscoviensis NSP M-1
2649142415	Ga0081711_112140 Rubrerythrin	Pandoraea thiooxydans DSM 25325
640879222	Plav_3638 Rubrerythrin	Parvibaculum lavamentivorans DS-1
637943370	Bpro_3716 Rubrerythrin	Polaromonas sp. JS666
2635693178	Ga0077867_11511 Rubrerythrin	Polynucleobacter necessarius subsp. asymbioticus
2506718973	R2APBS1_0740 Rubrerythrin	Rhodanobacter sp. 2APBS1
637917192	Rfer_2375 Rubrerythrin	Rhodoferax ferrireducens T118
2636662749	Ga0081741_112372 Rubrerythrin	Sedimenticola sp. SIP-G1
2656681694	Ga0111309_112372 Rubrerythrin	Sedimenticola sp. SIP-G1 null replaces 81741
2609473308	Ga0069263_11245 Rubrerythrin	Sedimenticola thiotaurini SIP-G1
646687951	Slit_0302 Rubrerythrin	Sideroxydans lithotrophicus ES-1
641345934	rubY hypothetical protein	Sorangium cellulosum 'So ce 56'
2563703368	rubY Rubrerythrin	Sorangium cellulosum So0157-2
2506614939	Sulac_2706 Rubrerythrin	Sulfobacillus acidophilus NAL, DSM 10332
2511073742	TPY_0939 Rubrerythrin	Sulfobacillus acidophilus TPY
638199182	Saci_2272 rubrerythrin	Sulfolobus acidocaldarius DSM 639
2660631797	Ga0111731_11830 Rubrerythrin	Sulfolobus acidocaldarius GG12-C01-09
2524415436	SacN8_11075 Rubrerythrin	Sulfolobus acidocaldarius N8
2659933099	Ga0111782_11826 Rubrerythrin	Sulfolobus acidocaldarius NG05B_CO5_07
2540746135	SacRon12I_11320 Rubrerythrin	Sulfolobus acidocaldarius Ron12/I
2556803221	SUSAZ_10670 Rubrerythrin	Sulfolobus acidocaldarius SUSAZ
650477268	rr Rubrerythrin	Sulfolobus islandicus HVE10/4
646529635	rr Rubrerythrin	Sulfolobus islandicus L.D.8.5
643833215	rr Rubrerythrin	Sulfolobus islandicus L.S.2.15
2540847213	rr Rubrerythrin	Sulfolobus islandicus LAL14/1
643830433	rr Rubrerythrin	Sulfolobus islandicus M.14.25
643844414	rr Rubrerythrin	Sulfolobus islandicus M.16.27
643885272	rr Rubrerythrin	Sulfolobus islandicus M.16.4
650474445	rr Rubrerythrin	Sulfolobus islandicus REY15A
643838754	rr Rubrerythrin	Sulfolobus islandicus Y.G.57.14
643841657	rr Rubrerythrin	Sulfolobus islandicus Y.N.15.51
646943102	rr Rubrerythrin	Sulfolobus solfataricus 98/2
2636762041	rr Rubrerythrin	Sulfolobus solfataricus 98/2 SULC
638163850	rr Rubrerythrin (rr)	Sulfolobus solfataricus P2
2649209249	rr Rubrerythrin	Sulfolobus solfataricus SULA
2637144190	rr Rubrerythrin	Sulfolobus solfataricus SULB
638194856	ST2370 144aa long hypothetical rubrerythrin	Sulfolobus tokodaii str. 7 DNA
646639174	Thal_0940 Rubrerythrin	Thermocrinis albus DSM 14484
2512918629	Theru_1067 Rubrerythrin	Thermocrinis ruber DSM 12173
650771178	TUZN_0874 hypothetical protein	Thermoproteus uzoniensis 768-20
2521966497	rbr Rubrerythrin	Thioalkalivibrio nitratireducens DSM 14787
643615714	rbr Rubrerythrin	Thioalkalivibrio sp. HL-EbGR7
646624800	rbr Rubrerythrin	Thioalkalivibrio sp. K90mix
2506725695	rbr Rubrerythrin	Thioalkalivibrio thiocyanoxidans ARh 4
2632517441	rbr Rubrerythrin	Thioalkalivibrio versutus D301
637709789	Tbd_1106 putative oxidative stress related rubrerythrin protein	Thiobacillus denitrificans ATCC 25259
2508736510	Thivi_0501 Rubrerythrin	Thiocystis violascens 611, DSM 198
648202548	Vdis_2249 Rubrerythrin	Vulcanisaeta distributa DSM 14429
650506997	VMUT_0648 Rubrerythrin	Vulcanisaeta moutnovskia 768-28
2655293537	Ga0098257_11182 Rubrerythrin	Wenzhouxiangella marina KCTC 42284

## Sheet: DUF3501
gene_oid	Locus Tag / Gene Product Name	Source
638153385	BCAM0852 hypothetical protein	Burkholderia cepacia AMMD
637564198	BPSS1837 hypothetical protein	Burkholderia mallei ATCC 23344
638199184	Saci_2274 conserved protein	Sulfolobus acidocaldarius DSM 639
640094697	BPSS1837 hypothetical protein	Burkholderia mallei NCTC 10229
640132564	BPSS1837 hypothetical protein	Burkholderia pseudomallei 668I
641274563	Cmaq_0060 hypothetical protein	Caldivirga maquilingensis IC-167
643593611	A2cp1_0818 hypothetical protein	Anaeromyxobacter dehalogenans 2CP-1
643885270	SSO2644 hypothetical protein	Sulfolobus islandicus M.16.4
650506998	VMUT_0649 hypothetical protein	Vulcanisaeta moutnovskia 768-28
2511073744	TPY_0941 Protein of unknown function (DUF3501)	Sulfobacillus acidophilus TPY
2588207403	F822DRAFT_2757 Protein of unknown function (DUF3501)	Nitrosospira briensis C-128
2590851712	BCAM0852 Protein of unknown function (DUF3501)	Burkholderia cepacia JBK9
2598341021	BPSS1837 Protein of unknown function (DUF3501)	Burkholderia pseudomallei BEX
2598416654	BPSS1837 Protein of unknown function (DUF3501)	Burkholderia mallei FMH 23344
2598450827	BPSS1837 Protein of unknown function (DUF3501)	Burkholderia pseudomallei BFB
2599797498	JGI3_00924 Protein of unknown function (DUF3501)	Kryptonium sp. JGI-3 Ga0063199
2632123243	BPSS1837 Protein of unknown function (DUF3501)	Burkholderia thailandensis 34
2632872373	BPSS1837 Protein of unknown function (DUF3501)	Burkholderia pseudomallei MSHR2543
2635809690	BPSS1837 Protein of unknown function (DUF3501)	Burkholderia thailandensis MSMB59
2636662746	Ga0081741_112369 Protein of unknown function (DUF3501)	Sedimenticola sp. SIP-G1
2636924600	BPSS1837 Protein of unknown function (DUF3501)	Burkholderia thailandensis E254
2638617155	Ga0069754_12586 Protein of unknown function (DUF3501)	Burkholderia multivorans CEPA002, ATCC BAA-247
2643278985	AN416_21845 Protein of unknown function (DUF3501)	Burkholderia caribensis LMG 18531
2646685817	BPSS1837 Protein of unknown function (DUF3501)	Burkholderia mallei 2002721276
2647889862	Ga0100904_142700 Protein of unknown function (DUF3501)	Azospirillum thiophilum BV-S
2649044779	BPSS1837 Protein of unknown function (DUF3501)	Burkholderia mallei 2002734299
2649142413	Ga0081711_112138 Protein of unknown function (DUF3501)	Pandoraea thiooxydans DSM 25325
2651676397	BPSS1837 Protein of unknown function (DUF3501)	Burkholderia pseudomallei vgh16R
2654677337	BPSS1837 Protein of unknown function (DUF3501)	Burkholderia pseudomallei 406e
637880431	Francci3_3110 hypothetical protein	Frankia sp. CcI3
637767126	BCAM0852 hypothetical protein	Burkholderia sp. 383
638194854	ST2368 188aa long hypothetical protein	Sulfolobus tokodaii str. 7 DNA
641683490	BCAM0852 hypothetical protein	Burkholderia ambifaria MC40-6
642762266	AnaeK_0814 hypothetical protein	Anaeromyxobacter sp. K
643615717	Tgr7_0838 hypothetical protein	Thioalkalivibrio sp. HL-EbGR7
643833213	SSO2644 hypothetical protein	Sulfolobus islandicus L.S.2.15
643841655	SSO2644 hypothetical protein	Sulfolobus islandicus Y.N.15.51
646639173	Thal_0939 hypothetical protein	Thermocrinis albus DSM 14484
646624803	TK90_0421 hypothetical protein	Thioalkalivibrio sp. K90mix
649748890	FraEuI1c_1791 hypothetical protein	Frankia sp. EuI1c
650474443	SSO2644 fructose-6-phosphate aldolase 2	Sulfolobus islandicus REY15A
2508740294	Thivi_4286 Protein of unknown function (DUF3501)	Thiocystis violascens 611, DSM 198
2506742342	B1NLA3E_1896 Protein of unknown function (DUF3501)	Bacillus sp. 1NLA3E
2506867741	FsymDg_3183 Protein of unknown function (DUF3501)	Frankia symbiont of Datisca glomerata
651042137	Atc_0871 hypothetical protein	Acidithiobacillus caldus SM-1
2505958970	hydr_0001.00008840 Protein of unknown function (DUF3501)	Hydrogenobaculum sp. SHO (Final Finished Sequence)
2520067231	Q91_1432 Protein of unknown function (DUF3501)	Cycloclasticus sp. P1
2521949827	BPSS1837 Protein of unknown function (DUF3501)	Burkholderia pseudomallei BPC006
2521978955	BCAM0852 Protein of unknown function (DUF3501)	Burkholderia cepacia GG4
2540746137	SacRon12I_11330 Protein of unknown function (DUF3501)	Sulfolobus acidocaldarius Ron12/I
2559244104	BPSS1837 Protein of unknown function (DUF3501)	Burkholderia pseudomallei MSHR511
2563663512	BPSS1837 Protein of unknown function (DUF3501)	Burkholderia pseudomallei MSHR305
2563703370	sce1755 Protein of unknown function (DUF3501)	Sorangium cellulosum So0157-2
2598268198	BPSS1837 Protein of unknown function (DUF3501)	Burkholderia pseudomallei BEO
2598292809	BPSS1837 Protein of unknown function (DUF3501)	Burkholderia mallei BMY
2598399632	BPSS1837 Protein of unknown function (DUF3501)	Burkholderia pseudomallei MSHR5848
2630056817	BPSS1837 Protein of unknown function (DUF3501)	Burkholderia pseudomallei K42
2631626763	BPSS1837 Protein of unknown function (DUF3501)	Burkholderia pseudomallei MSHR2243
2632080553	BPSS1837 Protein of unknown function (DUF3501)	Burkholderia pseudomallei A79A
2636762039	SSO2644 Protein of unknown function (DUF3501)	Sulfolobus solfataricus 98/2 SULC
2641368593	Ga0098214_114078 Protein of unknown function (DUF3501)	Nitrospira moscoviensis NSP M-1
2641367354	Ga0098214_112839 Protein of unknown function (DUF3501)	Nitrospira moscoviensis NSP M-1
2648077191	Ga0100896_11586 Protein of unknown function (DUF3501)	Metallosphaera sedula ARS120-1
2652608451	BPSS1837 Protein of unknown function (DUF3501)	Burkholderia pseudomallei Bp1651
2659933097	Ga0111782_11824 Protein of unknown function (DUF3501)	Sulfolobus acidocaldarius NG05B_CO5_07
2668554488	BPSS1837 Protein of unknown function (DUF3501)	Burkholderia pseudomallei MSHR1328 null replaces 78555
639695875	BCAM0852 hypothetical protein	Burkholderia cenocepacia HI2424
641650815	BCAM0852 hypothetical protein	Burkholderia cenocepacia MC0-3
642750703	HY04AAS1_0897 hypothetical protein	Hydrogenobaculum sp. Y04AAS1
646389993	Hoch_5319 hypothetical protein	Haliangium ochraceum DSM 14365
646386907	Hoch_2200 hypothetical protein	Haliangium ochraceum DSM 14365
646541317	HTH_1221 hypothetical protein	Hydrogenobacter thermophilus TK-6
646687953	Slit_0304 hypothetical protein	Sideroxydans lithotrophicus ES-1
648202547	Vdis_2248 hypothetical protein	Vulcanisaeta distributa DSM 14429
650477266	SSO2644 fructose-6-phosphate aldolase 2	Sulfolobus islandicus HVE10/4
650753535	NAL212_0968 hypothetical protein	Nitrosomonas sp. AL212
650771177	TUZN_0872 hypothetical protein	Thermoproteus uzoniensis 768-20
2506718971	R2APBS1_0738 Protein of unknown function (DUF3501)	Rhodanobacter sp. 2APBS1
2527195720	BCAM0852 Protein of unknown function (DUF3501)	Burkholderia dolosa PC543 (LMG 19468)
2556803223	SUSAZ_10680 Protein of unknown function (DUF3501)	Sulfolobus acidocaldarius SUSAZ
2563748386	BPSS1837 Protein of unknown function (DUF3501)	Burkholderia pseudomallei MSHR520
2598314785	BPSS1837 Protein of unknown function (DUF3501)	Burkholderia mallei 23344
2598439920	BCAM0852 Protein of unknown function (DUF3501)	Burkholderia multivorans DDS 15A-1
2629552893	BPSS1837 Protein of unknown function (DUF3501)	Burkholderia pseudomallei 7894
2630093715	BPSS1837 Protein of unknown function (DUF3501)	Burkholderia thailandensis BDK
2633564437	BPSS1837 Protein of unknown function (DUF3501)	Burkholderia pseudomallei NAU35A-3
2636758914	BPSS1837 Protein of unknown function (DUF3501)	Burkholderia pseudomallei MSHR62
2648757508	BCAM0852 Protein of unknown function (DUF3501)	Burkholderia dolosa AU0158
2651400532	BPSS1837 Protein of unknown function (DUF3501)	Burkholderia pseudomallei 350105
2651441631	Ga0098266_11940 Protein of unknown function (DUF3501)	Azoarcus sp. CIB
2677844606	Ga0123801_11770 Protein of unknown function (DUF3501)	Burkholderiales bacterium GJ-E10
637671264	SAR11_0401 hypothetical protein	Candidatus Pelagibacter ubique HTCC1062
640506200	Msed_0294 hypothetical protein	Metallosphaera sedula DSM 5348
643838752	SSO2644 hypothetical protein	Sulfolobus islandicus Y.G.57.14
648213117	Fbal_1757 hypothetical protein	Ferrimonas balearica DSM 9799
649662140	NIDE4039 hypothetical protein	Candidatus Nitrospira defluvii
2512038595	AZOBR_10295 Protein of unknown function (DUF3501)	Azospirillum brasilense Sp245
2512918630	Theru_1068 Protein of unknown function (DUF3501)	Thermocrinis ruber DSM 12173
2506377803	HydHO_0892 Protein of unknown function (DUF3501)	Hydrogenobaculum sp. HO ((Finished QAed))
2521966494	TVNIR_3429 Protein of unknown function (DUF3501)	Thioalkalivibrio nitratireducens DSM 14787
2524415438	SacN8_11085 Protein of unknown function (DUF3501)	Sulfolobus acidocaldarius N8
2555777299	BPSS1837 Protein of unknown function (DUF3501)	Burkholderia pseudomallei NCTC 13179
2559254127	BPSS1837 Protein of unknown function (DUF3501)	Burkholderia pseudomallei NCTC 13178
2559267609	BPSS1837 Protein of unknown function (DUF3501)	Burkholderia thailandensis 2002721723
2562496088	CYCME_1032 Protein of unknown function (DUF3501)	Cycloclasticus zancles 7-ME
2598209998	BPSS1837 Protein of unknown function (DUF3501)	Burkholderia pseudomallei BGR
2598216821	BPSS1837 Protein of unknown function (DUF3501)	Burkholderia pseudomallei MSHR5858
2598379239	BPSS1837 Protein of unknown function (DUF3501)	Burkholderia mallei BMQ
2598467218	BPSS1837 Protein of unknown function (DUF3501)	Burkholderia mallei BMK
2598486740	BPSS1837 Protein of unknown function (DUF3501)	Burkholderia pseudomallei HBPUB10303a
2598521885	BPSS1837 Protein of unknown function (DUF3501)	Burkholderia pseudomallei BSR
2628442382	BPSS1837 Protein of unknown function (DUF3501)	Burkholderia pseudomallei MSHR668
2628972400	Ga0077839_121746 Protein of unknown function (DUF3501)	Burkholderia ubonensis MSMB22
2632517444	Ga0078031_11344 Protein of unknown function (DUF3501)	Thioalkalivibrio versutus D301
2632568887	BCAM0852 Protein of unknown function (DUF3501)	Burkholderia ambifaria AMMD
2635693180	Ga0077867_11513 Protein of unknown function (DUF3501)	Polynucleobacter necessarius subsp. asymbioticus
2647776942	BPSS1837 Protein of unknown function (DUF3501)	Burkholderia mallei KC_1092
2647996498	BPSS1837 Protein of unknown function (DUF3501)	Burkholderia pseudomallei vgh16W
2654730115	BCAM0852 Protein of unknown function (DUF3501)	Burkholderia cenocepacia ST32
2656600980	Ga0111282_11802 Protein of unknown function (DUF3501)	Beggiatoa leptomitiformis D-402 null replaces 100909
2656681691	Ga0111309_112369 Protein of unknown function (DUF3501)	Sedimenticola sp. SIP-G1 null replaces 81741
2662414295	BCAM0852 Protein of unknown function (DUF3501)	Burkholderia cepacia JBK9 (unscreened) replaces 59394
637862288	Adeh_0767 hypothetical protein	Anaeromyxobacter dehalogenans 2CP-C
637571268	BPSS1837 hypothetical protein	Burkholderia pseudomallei K96243
637837845	BPSS1837 hypothetical protein	Burkholderia thailandensis E264I
637943368	Bpro_3714 hypothetical protein	Polaromonas sp. JS666
640090664	Mpe_A2096 hypothetical protein	Methylibium petroleiphilum PM1
640879224	Plav_3640 hypothetical protein	Parvibaculum lavamentivorans DS-1
641665449	Lcho_2672 hypothetical protein	Leptothrix cholodnii SP-6
643844412	SSO2644 hypothetical protein	Sulfolobus islandicus M.16.27
2506379470	Hyd3684_0887 Protein of unknown function (DUF3501)	Hydrogenobaculum sp. 3684 ((Finished QAed))
2519477994	LFML04_0571 Protein of unknown function (DUF3501)	Leptospirillum ferriphilum ML-04
2540843955	BPSS1837 Protein of unknown function (DUF3501)	Burkholderia thailandensis MSMB121
2540847211	SSO2644 Protein of unknown function (DUF3501)	Sulfolobus islandicus LAL14/1
2559234467	BPSS1837 Protein of unknown function (DUF3501)	Burkholderia pseudomallei NAU20B-16
2598383530	BPSS1837 Protein of unknown function (DUF3501)	Burkholderia mallei 092700E
2598388460	BPSS1837 Protein of unknown function (DUF3501)	Burkholderia pseudomallei Mahidol-1106a
2598406296	Ga0059204_06103 Protein of unknown function (DUF3501)	Burkholderia oklahomensis BDU
2598410396	BPSS1837 Protein of unknown function (DUF3501)	Burkholderia pseudomallei MSHR5855
2629435397	BPSS1837 Protein of unknown function (DUF3501)	Burkholderia pseudomallei BDP
2632116368	BPSS1837 Protein of unknown function (DUF3501)	Burkholderia sp. TSV202
2633141941	BCAM0852 Protein of unknown function (DUF3501)	Burkholderia pyrrocinia strain:DSM 10685
2633800323	BPSS1837 Protein of unknown function (DUF3501)	Burkholderia thailandensis 2002721643
2636469611	BPSS1837 Protein of unknown function (DUF3501)	Burkholderia pseudomallei 3921g
2636819137	BPSS1837 Protein of unknown function (DUF3501)	Burkholderia pseudomallei vgh07
2637821213	BPSS1837 Protein of unknown function (DUF3501)	Burkholderia pseudomallei PB08298010
2637982365	BPSS1837 Protein of unknown function (DUF3501)	Burkholderia mallei 2002734306
2642173072	BPSS1837 Protein of unknown function (DUF3501)	Burkholderia mallei 11
2647854084	BPSS1837 Protein of unknown function (DUF3501)	Burkholderia pseudomallei 982
2649217996	Ga0100884_11586 Protein of unknown function (DUF3501)	Metallosphaera sedula ARS50-2
2660631795	Ga0111731_11828 Protein of unknown function (DUF3501)	Sulfolobus acidocaldarius GG12-C01-09
2668396992	BPSS1837 Protein of unknown function (DUF3501)	Burkholderia pseudomallei MSHR435 null replaces 78605
637709791	Tbd_1108 hypothetical protein	Thiobacillus denitrificans ATCC 25259
637811930	Nmul_A1845 hypothetical protein	Nitrosospira multiformis ATCC 25196
641319214	BCAM0852 hypothetical protein	Burkholderia multivorans ATCC 17616
642673659	BCAM0852 hypothetical protein	Burkholderia multivorans ATCC 17616
643353292	BCAM0852 hypothetical protein	Burkholderia cenocepacia J2315
646529633	SSO2644 hypothetical protein	Sulfolobus islandicus L.D.8.5
650822163	Mcup_1774 hypothetical protein	Metallosphaera cuprina Ar-4
2540712058	BN69_0482 Protein of unknown function (DUF3501)	Methylocystis sp. SC2
2578398464	Y981_02805 Protein of unknown function (DUF3501)	Leptospirillum ferriphilum YSK
2579564345	ABAZ39_01340 Protein of unknown function (DUF3501)	Azospirillum brasilense Az39
2598456077	BCAM0852 Protein of unknown function (DUF3501)	Burkholderia cenocepacia DDS 22E-1
2609473311	Ga0069263_11248 Protein of unknown function (DUF3501)	Sedimenticola thiotaurini SIP-G1
2628765959	BPSS1837 Protein of unknown function (DUF3501)	Burkholderia sp. BGK
2640362643	K788_0000683 Protein of unknown function (DUF3501)	Burkholderia caribensis MBA4 (Finished genome of Burkholderia caribensis MBA4)
2640998208	BCAM0852 Protein of unknown function (DUF3501)	Burkholderia cenocepacia DWS 37E-2
2647669965	BPSS1837 Protein of unknown function (DUF3501)	Burkholderia pseudomallei MSHR3965
2648507995	BPSS1837 Protein of unknown function (DUF3501)	Burkholderia pseudomallei MSHR840
2655040240	Ga0081805_11638 Protein of unknown function (DUF3501)	Leptospirillum sp. Group II CF-1
2655720768	Ga0057671_112088 Protein of unknown function (DUF3501)	Candidatus Paracaedibacter acanthamoebae PRA3
638017833	BCAM0852 hypothetical protein	Burkholderia cenocepacia AU 1054
640146581	BPSS1837 hypothetical protein	Burkholderia mallei NCTC 10247
640145593	BPSS1837 hypothetical protein	Burkholderia pseudomallei 1106aI
641345936	sce1755 hypothetical protein	Sorangium cellulosum 'So ce 56'
643830431	SSO2644 hypothetical protein	Sulfolobus islandicus M.14.25
646943104	SSO2644 conserved hypothetical protein	Sulfolobus solfataricus 98/2
2507463578	HydSN_0915 Protein of unknown function (DUF3501)	Hydrogenobaculum sp. SN
650847273	Ahos_1045 fructose-6-phosphate aldolase 2	Acidianus hospitalis W1
2540577658	LFE_0816 Protein of unknown function (DUF3501)	Leptospirillum ferrooxidans C2-3
2559274241	BPSS1837 Protein of unknown function (DUF3501)	Burkholderia thailandensis E444
2585942889	BPSS1837 Protein of unknown function (DUF3501)	Burkholderia thailandensis USAMRU Malaysia #20
2629013911	BPSS1837 Protein of unknown function (DUF3501)	Burkholderia pseudomallei MSHR1153
2630033488	BPSS1837 Protein of unknown function (DUF3501)	Burkholderia sp. 2002721687
2630394551	BPSS1837 Protein of unknown function (DUF3501)	Burkholderia pseudomallei MSHR491
2636866909	BPSS1837 Protein of unknown function (DUF3501)	Burkholderia mallei India86-567-2
2646038626	Ga0098217_113881 Protein of unknown function (DUF3501)	Labilithrix luteola DSM 27648
2646223084	Ga0100909_11802 Protein of unknown function (DUF3501)	Beggiatoa leptomitiformis D-402
2652524515	Ga0100883_11585 Protein of unknown function (DUF3501)	Metallosphaera sedula SARC-M1
2653063006	BPSS1837 Protein of unknown function (DUF3501)	Burkholderia pseudomallei K96243
2655293535	Ga0098257_11180 Protein of unknown function (DUF3501)	Wenzhouxiangella marina KCTC 42284
638101788	FRAAL5115 hypothetical protein	Frankia alni ACN14a
637917190	Rfer_2373 hypothetical protein	Rhodoferax ferrireducens T118
638163852	SSO2644 Hypothetical protein	Sulfolobus solfataricus P2
639843966	BPSS1837 hypothetical protein	Burkholderia mallei SAVP1
640842322	Anae109_0813 hypothetical protein	Anaeromyxobacter sp. Fw109-5
641240729	Franean1_1808 hypothetical protein	Frankia sp. EAN1pec
642595875	Bphy_4114 hypothetical protein	Burkholderia phymatum STM815
650434381	Hydth_1213 conserved hypothetical protein	Hydrogenobacter thermophilus TK-6
2506614937	Sulac_2704 Protein of unknown function (DUF3501)	Sulfobacillus acidophilus NAL, DSM 10332
2506725698	Thith_0539 Protein of unknown function (DUF3501)	Thioalkalivibrio thiocyanoxidans ARh 4
651003838	Nit79A3_2480 hypothetical protein	Nitrosomonas sp. Is79A3
2514235336	BPSS1837 Protein of unknown function (DUF3501)	Burkholderia pseudomallei 1026b
2522025114	HIMB5_00013160 Protein of unknown function (DUF3501)	alpha proteobacterium sp. HIMB59 HIMB5
2559247623	BPSS1837 Protein of unknown function (DUF3501)	Burkholderia pseudomallei MSHR146
2559260364	BPSS1837 Protein of unknown function (DUF3501)	Burkholderia thailandensis H0587
2563611188	AZKH_1052 Protein of unknown function (DUF3501)	Azoarcus sp. KH32C
2598309535	BCAM0852 Protein of unknown function (DUF3501)	Burkholderia cepacia DDS 7H-2
2598325193	BPSS1837 Protein of unknown function (DUF3501)	Burkholderia pseudomallei BEZ
2599221272	BPSS1837 Protein of unknown function (DUF3501)	Burkholderia pseudomallei HBPUB10134a
2628341009	Ga0077889_12888 Protein of unknown function (DUF3501)	Burkholderia oklahomensis C6786
2628487323	BPSS1837 Protein of unknown function (DUF3501)	Burkholderia pseudomallei TSV 48
2628588844	BPSS1837 Protein of unknown function (DUF3501)	Burkholderia pseudomallei 1026b
2628672963	BPSS1837 Protein of unknown function (DUF3501)	Burkholderia pseudomallei MSHR1328
2636440019	BPSS1837 Protein of unknown function (DUF3501)	Burkholderia pseudomallei B03
2637144188	SSO2644 Protein of unknown function (DUF3501)	Sulfolobus solfataricus SULB
2645880735	Ga0100943_11586 Protein of unknown function (DUF3501)	Metallosphaera sedula ARS120-2
2649209247	SSO2644 Protein of unknown function (DUF3501)	Sulfolobus solfataricus SULA

## Sheet: RFO
gene_oid	Locus Tag / Gene Product Name	Source
651042138	Atc_0872 anaerobic glycerol-3-phosphate dehydrogenase subunit C	Acidithiobacillus caldus SM-1
2522025115	HIMB5_00013170 glycerol-3-phosphate dehydrogenase subunit C	alpha proteobacterium sp. HIMB59 HIMB5
643593610	A2cp1_0817 glycerol 3-phosphate dehydrogenase (quinone) subunit C (EC 1.1.5.3)	Anaeromyxobacter dehalogenans 2CP-1
637862287	Adeh_0766 glycerol 3-phosphate dehydrogenase (quinone) subunit C (EC 1.1.5.3)	Anaeromyxobacter dehalogenans 2CP-C
640842321	Anae109_0812 glycerol 3-phosphate dehydrogenase (quinone) subunit C (EC 1.1.5.3)	Anaeromyxobacter sp. Fw109-5
642762265	AnaeK_0813 glycerol 3-phosphate dehydrogenase (quinone) subunit C (EC 1.1.5.3)	Anaeromyxobacter sp. K
2563611187	AZKH_1051 Fe-S oxidoreductase	Azoarcus sp. KH32C
2647889863	Ga0100904_142701 glycerol-3-phosphate dehydrogenase subunit C	Azospirillum thiophilum BV-S
2646223083	Ga0100909_11801 Fe-S oxidoreductase	Beggiatoa leptomitiformis D-402
2656600979	Ga0111282_11801 Fe-S oxidoreductase	Beggiatoa leptomitiformis D-402 null replaces 100909
2632568886	BCAM0851 Fe-S oxidoreductase	Burkholderia ambifaria AMMD
641683489	BCAM0851 Fe-S oxidoreductase-like protein	Burkholderia ambifaria MC40-6
2643278986	AN416_21850 Fe-S oxidoreductase	Burkholderia caribensis LMG 18531
2640362642	K788_0000684 Fe-S oxidoreductase	Burkholderia caribensis MBA4 (Finished genome of Burkholderia caribensis MBA4)
638017834	BCAM0851 Fe-S oxidoreductase-like	Burkholderia cenocepacia AU 1054
2598456078	BCAM0851 Fe-S oxidoreductase	Burkholderia cenocepacia DDS 22E-1
2640998207	BCAM0851 Fe-S oxidoreductase	Burkholderia cenocepacia DWS 37E-2
639695874	BCAM0851 Fe-S oxidoreductase-like protein	Burkholderia cenocepacia HI2424
643353291	BCAM0851 hypothetical protein	Burkholderia cenocepacia J2315
641650816	BCAM0851 Fe-S oxidoreductase-like protein	Burkholderia cenocepacia MC0-3
2654730114	BCAM0851 Fe-S oxidoreductase	Burkholderia cenocepacia ST32
638153384	BCAM0851 Fe-S oxidoreductase-like protein	Burkholderia cepacia AMMD
2598309534	BCAM0851 Fe-S oxidoreductase	Burkholderia cepacia DDS 7H-2
2521978956	BCAM0851 Fe-S oxidoreductase	Burkholderia cepacia GG4
2662414294	BCAM0851 Fe-S oxidoreductase	Burkholderia cepacia JBK9 (unscreened) replaces 59394
2648757509	BCAM0851 Fe-S oxidoreductase	Burkholderia dolosa AU0158
2527195719	BCAM0851 Fe-S oxidoreductase	Burkholderia dolosa PC543 (LMG 19468)
2598383531	BPSS1838 Fe-S oxidoreductase	Burkholderia mallei 092700E
2642173071	BPSS1838 Fe-S oxidoreductase	Burkholderia mallei 11
2646685816	BPSS1838 Fe-S oxidoreductase	Burkholderia mallei 2002721276
2649044780	BPSS1838 Fe-S oxidoreductase	Burkholderia mallei 2002734299
2637982366	BPSS1838 Fe-S oxidoreductase	Burkholderia mallei 2002734306
2598314786	BPSS1838 Fe-S oxidoreductase	Burkholderia mallei 23344
637564197	BPSS1838 hypothetical protein	Burkholderia mallei ATCC 23344
2598467219	BPSS1838 Fe-S oxidoreductase	Burkholderia mallei BMK
2598379240	BPSS1838 Fe-S oxidoreductase	Burkholderia mallei BMQ
2598292808	BPSS1838 Fe-S oxidoreductase	Burkholderia mallei BMY
2598416653	BPSS1838 Fe-S oxidoreductase	Burkholderia mallei FMH 23344
2636866908	BPSS1838 Fe-S oxidoreductase	Burkholderia mallei India86-567-2
2647776941	BPSS1838 Fe-S oxidoreductase	Burkholderia mallei KC_1092
640094696	BPSS1838 hypothetical protein	Burkholderia mallei NCTC 10229
640146580	BPSS1838 hypothetical protein	Burkholderia mallei NCTC 10247
639843965	BPSS1838 hypothetical protein	Burkholderia mallei SAVP1
641319215	BCAM0851 Fe-S oxidoreductase-like protein	Burkholderia multivorans ATCC 17616
642673658	glpC glycerol-3-phosphate dehydrogenase subunit C	Burkholderia multivorans ATCC 17616
2598439921	BCAM0851 Fe-S oxidoreductase	Burkholderia multivorans DDS 15A-1
2598406297	BPSS1838 Fe-S oxidoreductase	Burkholderia oklahomensis BDU
2628341008	BPSS1838 Fe-S oxidoreductase	Burkholderia oklahomensis C6786
642595876	Bphy_4115 Fe-S oxidoreductase-like protein	Burkholderia phymatum STM815
2514235337	BPSS1838 Fe-S oxidoreductase	Burkholderia pseudomallei 1026b
2628588843	BPSS1838 Fe-S oxidoreductase	Burkholderia pseudomallei 1026b
640145594	BPSS1838 hypothetical protein	Burkholderia pseudomallei 1106aI
2651400533	BPSS1838 Fe-S oxidoreductase	Burkholderia pseudomallei 350105
2636469612	BPSS1838 Fe-S oxidoreductase	Burkholderia pseudomallei 3921g
2654677338	BPSS1838 Fe-S oxidoreductase	Burkholderia pseudomallei 406e
640132565	BPSS1838 hypothetical protein	Burkholderia pseudomallei 668I
2629552894	BPSS1838 Fe-S oxidoreductase	Burkholderia pseudomallei 7894
2647854083	BPSS1838 Fe-S oxidoreductase	Burkholderia pseudomallei 982
2632080552	BPSS1838 Fe-S oxidoreductase	Burkholderia pseudomallei A79A
2636440018	BPSS1838 Fe-S oxidoreductase	Burkholderia pseudomallei B03
2629435398	BPSS1838 Fe-S oxidoreductase	Burkholderia pseudomallei BDP
2598268197	BPSS1838 Fe-S oxidoreductase	Burkholderia pseudomallei BEO
2598341020	BPSS1838 Fe-S oxidoreductase	Burkholderia pseudomallei BEX
2598325192	BPSS1838 Fe-S oxidoreductase	Burkholderia pseudomallei BEZ
2598450826	BPSS1838 Fe-S oxidoreductase	Burkholderia pseudomallei BFB
2598209999	BPSS1838 Fe-S oxidoreductase	Burkholderia pseudomallei BGR
2652608452	BPSS1838 Fe-S oxidoreductase	Burkholderia pseudomallei Bp1651
2521949828	BPSS1838 Fe-S oxidoreductase	Burkholderia pseudomallei BPC006
2598521886	BPSS1838 Fe-S oxidoreductase	Burkholderia pseudomallei BSR
2599221271	BPSS1838 Fe-S oxidoreductase	Burkholderia pseudomallei HBPUB10134a
2598486741	BPSS1838 Fe-S oxidoreductase	Burkholderia pseudomallei HBPUB10303a
2630056816	BPSS1838 Fe-S oxidoreductase	Burkholderia pseudomallei K42
2653063007	BPSS1838 Fe-S oxidoreductase	Burkholderia pseudomallei K96243
637571269	BPSS1838 ferredoxin	Burkholderia pseudomallei K96243
2598388459	BPSS1838 Fe-S oxidoreductase	Burkholderia pseudomallei Mahidol-1106a
2629013912	BPSS1838 Fe-S oxidoreductase	Burkholderia pseudomallei MSHR1153
2628672964	BPSS1838 Fe-S oxidoreductase	Burkholderia pseudomallei MSHR1328
2668554489	BPSS1838 Fe-S oxidoreductase	Burkholderia pseudomallei MSHR1328 null replaces 78555
2559247624	BPSS1838 Fe-S oxidoreductase	Burkholderia pseudomallei MSHR146
2631626764	BPSS1838 Fe-S oxidoreductase	Burkholderia pseudomallei MSHR2243
2632872374	BPSS1838 Fe-S oxidoreductase	Burkholderia pseudomallei MSHR2543
2563663513	BPSS1838 Fe-S oxidoreductase	Burkholderia pseudomallei MSHR305
2647669966	BPSS1838 Fe-S oxidoreductase	Burkholderia pseudomallei MSHR3965
2668396993	BPSS1838 Fe-S oxidoreductase	Burkholderia pseudomallei MSHR435 null replaces 78605
2630394552	BPSS1838 Fe-S oxidoreductase	Burkholderia pseudomallei MSHR491
2559244103	BPSS1838 Fe-S oxidoreductase	Burkholderia pseudomallei MSHR511
2563748387	BPSS1838 Fe-S oxidoreductase	Burkholderia pseudomallei MSHR520
2598399631	BPSS1838 Fe-S oxidoreductase	Burkholderia pseudomallei MSHR5848
2598410397	BPSS1838 Fe-S oxidoreductase	Burkholderia pseudomallei MSHR5855
2598216822	BPSS1838 Fe-S oxidoreductase	Burkholderia pseudomallei MSHR5858
2636758915	BPSS1838 Fe-S oxidoreductase	Burkholderia pseudomallei MSHR62
2628442383	BPSS1838 Fe-S oxidoreductase	Burkholderia pseudomallei MSHR668
2648507996	BPSS1838 Fe-S oxidoreductase	Burkholderia pseudomallei MSHR840
2559234466	BPSS1838 Fe-S oxidoreductase	Burkholderia pseudomallei NAU20B-16
2633564436	BPSS1838 Fe-S oxidoreductase	Burkholderia pseudomallei NAU35A-3
2559254128	BPSS1838 Fe-S oxidoreductase	Burkholderia pseudomallei NCTC 13178
2555777300	BPSS1838 Fe-S oxidoreductase	Burkholderia pseudomallei NCTC 13179
2637821214	BPSS1838 Fe-S oxidoreductase	Burkholderia pseudomallei PB08298010
2628487322	BPSS1838 Fe-S oxidoreductase	Burkholderia pseudomallei TSV 48
2636819138	BPSS1838 Fe-S oxidoreductase	Burkholderia pseudomallei vgh07
2651676398	BPSS1838 Fe-S oxidoreductase	Burkholderia pseudomallei vgh16R
2647996499	BPSS1838 Fe-S oxidoreductase	Burkholderia pseudomallei vgh16W
2633141940	BCAM0851 Fe-S oxidoreductase	Burkholderia pyrrocinia strain:DSM 10685
2630033487	BPSS1838 Fe-S oxidoreductase	Burkholderia sp. 2002721687
637767127	BCAM0851 Fe-S oxidoreductase-like	Burkholderia sp. 383
2628765960	BPSS1838 Fe-S oxidoreductase	Burkholderia sp. BGK
2632116367	BPSS1838 Fe-S oxidoreductase	Burkholderia sp. TSV202
2633800322	BPSS1838 Fe-S oxidoreductase	Burkholderia thailandensis 2002721643
2559267608	BPSS1838 Fe-S oxidoreductase	Burkholderia thailandensis 2002721723
2632123242	BPSS1838 Fe-S oxidoreductase	Burkholderia thailandensis 34
2630093714	BPSS1838 Fe-S oxidoreductase	Burkholderia thailandensis BDK
2636924599	BPSS1838 Fe-S oxidoreductase	Burkholderia thailandensis E254
637837844	BPSS1838 hypothetical protein	Burkholderia thailandensis E264I
2559274240	BPSS1838 Fe-S oxidoreductase	Burkholderia thailandensis E444
2559260363	BPSS1838 Fe-S oxidoreductase	Burkholderia thailandensis H0587
2540843954	BPSS1838 Fe-S oxidoreductase	Burkholderia thailandensis MSMB121
2635809689	BPSS1838 Fe-S oxidoreductase	Burkholderia thailandensis MSMB59
2585942888	BPSS1838 Fe-S oxidoreductase	Burkholderia thailandensis USAMRU Malaysia #20
2628972399	BCAM0851 Fe-S oxidoreductase	Burkholderia ubonensis MSMB22
2638617154	BCAM0851 Fe-S oxidoreductase	Burkholderia ubonensis MSMB22
2677844605	Ga0123801_11769 Fe-S oxidoreductase	Burkholderiales bacterium GJ-E10
2508740293	Ga0123801_11769 Fe-S oxidoreductase	Burkholderiales bacterium GJ-E10
649662141	NIDE4040 putative fe-S oxidoreductase	Candidatus Nitrospira defluvii
2655720769	Ga0057671_112089 Fe-S oxidoreductase	Candidatus Paracaedibacter acanthamoebae PRA3
637671263	glpC Anaerobic glycerol-3-phosphate dehydrogenase subunit C	Candidatus Pelagibacter ubique HTCC1062
2520067232	Q91_1433 Fe-S oxidoreductase	Cycloclasticus sp. P1
2562496087	CYCME_1031 Fe-S oxidoreductase	Cycloclasticus zancles 7-ME
648213118	Fbal_1758 protein of unknown function DUF224 cysteine-rich region domain protein	Ferrimonas balearica DSM 9799
646541625	HTH_1527 Fe-S oxidoreductase	Hydrogenobacter thermophilus TK-6
650434686	Hydth_1515 protein of unknown function DUF224 cysteine-rich region domain protein	Hydrogenobacter thermophilus TK-6
2506379471	Hyd3684_0888 Fe-S oxidoreductase	Hydrogenobaculum sp. 3684 ((Finished QAed))
2506377804	HydHO_0893 Fe-S oxidoreductase	Hydrogenobaculum sp. HO ((Finished QAed))
2505958971	hydr_0001.00008850 Fe-S oxidoreductase	Hydrogenobaculum sp. SHO (Final Finished Sequence)
2507463579	HydSN_0916 Fe-S oxidoreductase	Hydrogenobaculum sp. SN
642750704	HY04AAS1_0898 protein of unknown function DUF224 cysteine-rich region domain protein	Hydrogenobaculum sp. Y04AAS1
2646038627	Ga0098217_113882 glycerol 3-phosphate dehydrogenase (quinone) subunit C	Labilithrix luteola DSM 27648
2519477993	LFML04_0570 Fe-S oxidoreductase	Leptospirillum ferriphilum ML-04
2578398463	Y981_02800 Fe-S oxidoreductase	Leptospirillum ferriphilum YSK
2655040239	Ga0081805_11637 Fe-S oxidoreductase	Leptospirillum sp. Group II CF-1
641665450	Lcho_2673 putative ferredoxin	Leptothrix cholodnii SP-6
650822162	Mcup_1773 hypothetical protein	Metallosphaera cuprina Ar-4
2648077192	Ga0100896_11587 glycerol-3-phosphate dehydrogenase subunit C	Metallosphaera sedula ARS120-1
2645880736	Ga0100943_11587 glycerol-3-phosphate dehydrogenase subunit C	Metallosphaera sedula ARS120-2
2649217997	Ga0100884_11587 glycerol-3-phosphate dehydrogenase subunit C	Metallosphaera sedula ARS50-2
2652524516	Ga0100883_11586 glycerol-3-phosphate dehydrogenase subunit C	Metallosphaera sedula SARC-M1
640090665	Mpe_A2097 putative ferredoxin	Methylibium petroleiphilum PM1
2540712059	BN69_0483 glycerol-3-phosphate dehydrogenase subunit C	Methylocystis sp. SC2
2599797496	BN69_0483 glycerol-3-phosphate dehydrogenase subunit C	Methylocystis sp. SC2
650753535	NAL212_0968 hypothetical protein	Nitrosomonas sp. AL212
651003838	Nit79A3_2480 hypothetical protein	Nitrosomonas sp. Is79A3
2588207402	F822DRAFT_2756 Fe-S oxidoreductase	Nitrosospira briensis C-128
637811931	Nmul_A1846 putative ferredoxin	Nitrosospira multiformis ATCC 25196
2641367355	Ga0098214_112840 Fe-S oxidoreductase	Nitrospira moscoviensis NSP M-1
2506614938	Ga0098214_112840 Fe-S oxidoreductase	Nitrospira moscoviensis NSP M-1
2641368594	Ga0098214_114079 Fe-S oxidoreductase	Nitrospira moscoviensis NSP M-1
2649142414	Ga0081711_112139 Fe-S oxidoreductase	Pandoraea thiooxydans DSM 25325
640879223	Plav_3639 anaerobic glycerol-3-phosphate dehydrogenase subunit C	Parvibaculum lavamentivorans DS-1
637943369	Bpro_3715 putative ferredoxin	Polaromonas sp. JS666
2635693179	Ga0077867_11512 Fe-S oxidoreductase	Polynucleobacter necessarius subsp. asymbioticus
2506718972	R2APBS1_0739 Fe-S oxidoreductase	Rhodanobacter sp. 2APBS1
637917191	Rfer_2374 putative ferredoxin	Rhodoferax ferrireducens T118
2636662748	Ga0081741_112371 Fe-S oxidoreductase	Sedimenticola sp. SIP-G1
2656681693	Ga0111309_112371 Fe-S oxidoreductase	Sedimenticola sp. SIP-G1 null replaces 81741
2609473309	Ga0069263_11246 Fe-S oxidoreductase	Sedimenticola thiotaurini SIP-G1
646687952	Slit_0303 protein of unknown function DUF224 cysteine-rich region domain protein	Sideroxydans lithotrophicus ES-1
2511073743	glpC Fe-S oxidoreductase	Sulfobacillus acidophilus TPY
638199183	Saci_2273 conserved cysteine-rich domain protein	Sulfolobus acidocaldarius DSM 639
2660631796	Ga0111731_11829 glycerol-3-phosphate dehydrogenase subunit C	Sulfolobus acidocaldarius GG12-C01-09
2524415437	SacN8_11080 glycerol-3-phosphate dehydrogenase subunit C	Sulfolobus acidocaldarius N8
2659933098	Ga0111782_11825 glycerol-3-phosphate dehydrogenase subunit C	Sulfolobus acidocaldarius NG05B_CO5_07
2540746136	SacRon12I_11325 glycerol-3-phosphate dehydrogenase subunit C	Sulfolobus acidocaldarius Ron12/I
2556803222	SUSAZ_10675 glycerol-3-phosphate dehydrogenase subunit C	Sulfolobus acidocaldarius SUSAZ
650474444	SUSAZ_10675 glycerol-3-phosphate dehydrogenase subunit C	Sulfolobus acidocaldarius SUSAZ
650477267	glpC conserved hypothetical protein	Sulfolobus islandicus HVE10/4
640506201	glpC conserved hypothetical protein	Sulfolobus islandicus HVE10/4
643833214	glpC protein of unknown function DUF224 cysteine-rich region domain protein	Sulfolobus islandicus L.S.2.15
2540847212	glpC glycerol-3-phosphate dehydrogenase subunit C	Sulfolobus islandicus LAL14/1
643830432	glpC protein of unknown function DUF224 cysteine-rich region domain protein	Sulfolobus islandicus M.14.25
643844413	glpC protein of unknown function DUF224 cysteine-rich region domain protein	Sulfolobus islandicus M.16.27
643885271	glpC protein of unknown function DUF224 cysteine-rich region domain protein	Sulfolobus islandicus M.16.4
646529634	glpC protein of unknown function DUF224 cysteine-rich region domain protein	Sulfolobus islandicus M.16.4
643838753	glpC protein of unknown function DUF224 cysteine-rich region domain protein	Sulfolobus islandicus Y.G.57.14
643841656	glpC protein of unknown function DUF224 cysteine-rich region domain protein	Sulfolobus islandicus Y.N.15.51
646943103	glpC protein of unknown function DUF224 cysteine-rich region domain protein	Sulfolobus solfataricus 98/2
2636762040	glpC glycerol-3-phosphate dehydrogenase subunit C	Sulfolobus solfataricus 98/2 SULC
638163851	glpC Glycerol-3-phosphate dehydrogenase chain C (anaerobic) (glpC)	Sulfolobus solfataricus P2
2649209248	glpC glycerol-3-phosphate dehydrogenase subunit C	Sulfolobus solfataricus SULA
2637144189	glpC glycerol-3-phosphate dehydrogenase subunit C	Sulfolobus solfataricus SULB
638194855	ST2369 396aa long hypothetical anaerobic glycerol-3-phosphate dehydrogenase subunit C	Sulfolobus tokodaii str. 7 DNA
646638504	Thal_0293 protein of unknown function DUF224 cysteine-rich region domain protein	Thermocrinis albus DSM 14484
2512918000	Theru_0438 Fe-S oxidoreductase	Thermocrinis ruber DSM 12173
2521966496	glpC Fe-S oxidoreductase	Thioalkalivibrio nitratireducens DSM 14787
643615715	Tgr7_0836 protein of unknown function DUF224 cysteine-rich region domain protein	Thioalkalivibrio sp. HL-EbGR7
646624801	TK90_0419 protein of unknown function DUF224 cysteine-rich region domain protein	Thioalkalivibrio sp. K90mix
2506725696	glpC Fe-S oxidoreductase	Thioalkalivibrio thiocyanoxidans ARh 4
2632517442	Ga0078031_11342 Fe-S oxidoreductase	Thioalkalivibrio versutus D301
637709790	Tbd_1107 putative ferredoxin	Thiobacillus denitrificans ATCC 25259
2655293536	Ga0098257_11181 Fe-S oxidoreductase	Wenzhouxiangella marina KCTC 42284
